# Supplementary material for: The archaeal ATPase PINA interacts with the helicase Hjm via its carboxyl terminal KH domain remodeling and processing replication fork and Holliday junction
Source: PubMed Central journal article supplement — Nucleic Acids Res. 2018 May 29;46(13):6627–41. doi: 10.1093/nar/gky451 (PMC6061704; doi:10.1093/nar/gky451), 2018-05-29
Supplement: gky451_supplemental_files.pdf [file gky451_supplemental_files.pdf]

## SUPPLEMENTARY MATERIALS

### **The archaeal ATPase PINA interacts with the helicase Hjm via its carboxyl terminal KH domain remodeling and processing replication fork and Holliday junction**

Binyuan Zhai<sup>1,#</sup>, Kevin DuPrez<sup>2</sup>, Xiaoyun Han<sup>1</sup>, Zenglin Yuan<sup>1</sup>, Sohail Ahmad<sup>1</sup>, Cheng Xu<sup>1</sup>, Lichuan Gu<sup>1</sup>, Jinfeng Ni<sup>1</sup>, Li Fan<sup>2\*</sup>, Yulong Shen<sup>1\*</sup>

1 State Key Laboratory of Microbial Technology, Microbiology and Biotechnology Institute, Shandong University, 72 Binhai Road, Jimo, Qingdao, Shandong 266237, P. R. China; 2 Department of Biochemistry, University of California, Riverside, CA 92521, USA

# Current address: Center for Reproductive Medicine, Shandong Provincial Hospital Affiliated to Shandong University, Jinan, Shandong 250001, P. R. China

\*To whom correspondence should be addressed.

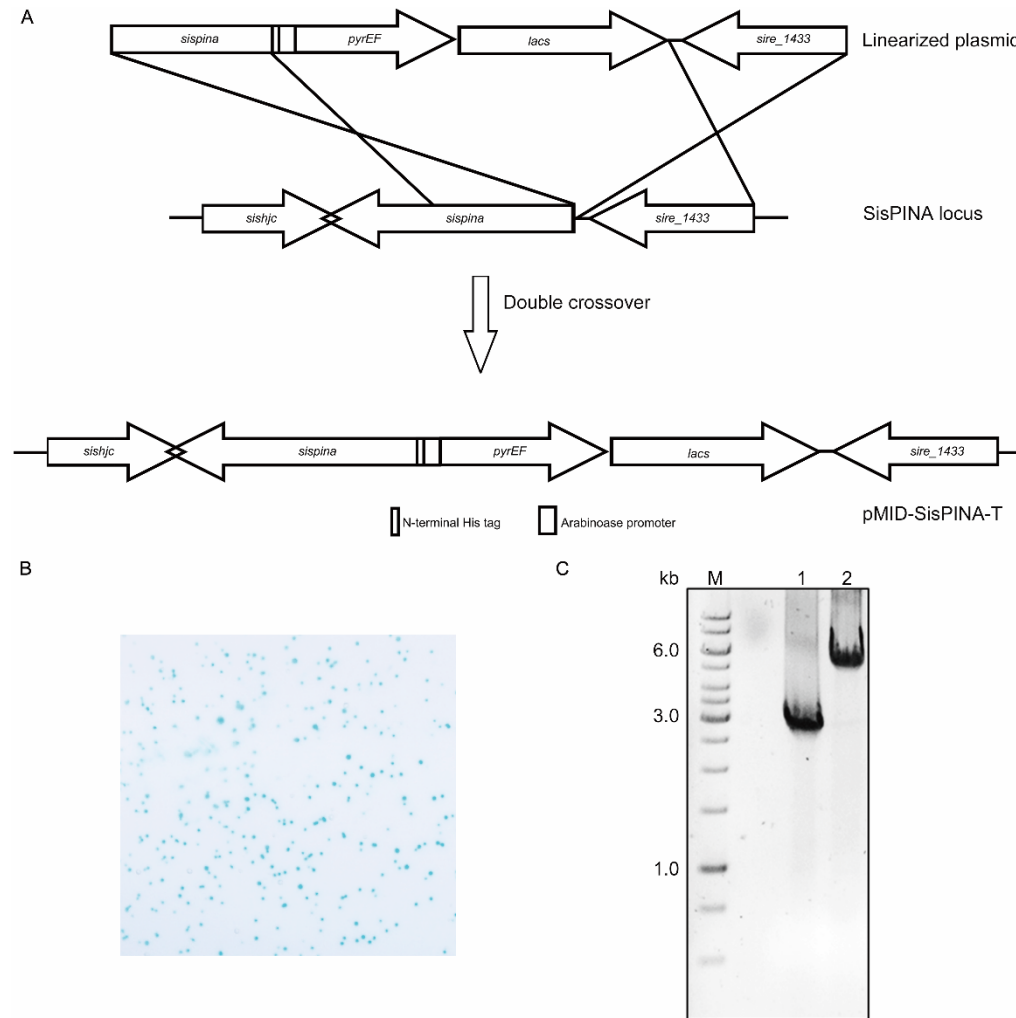

**Fig. S1 Construction of a strain coding an N-terminal 6 × His-tagged SisPINA by the chromosomal gene.** (A) A scheme for the construction of the strain. (B) Screening for positive transformants by X-gal staining. (C) Analysis of the genotype of the strain by PCR. The flanking primers described in reference (1) were used for the analysis. Lanes 1, genomic DNA of *S. islandicus* REY15A(E233S); 2, genomic DNA of Sis/pMID-SisPINA-in-situ-N-His.

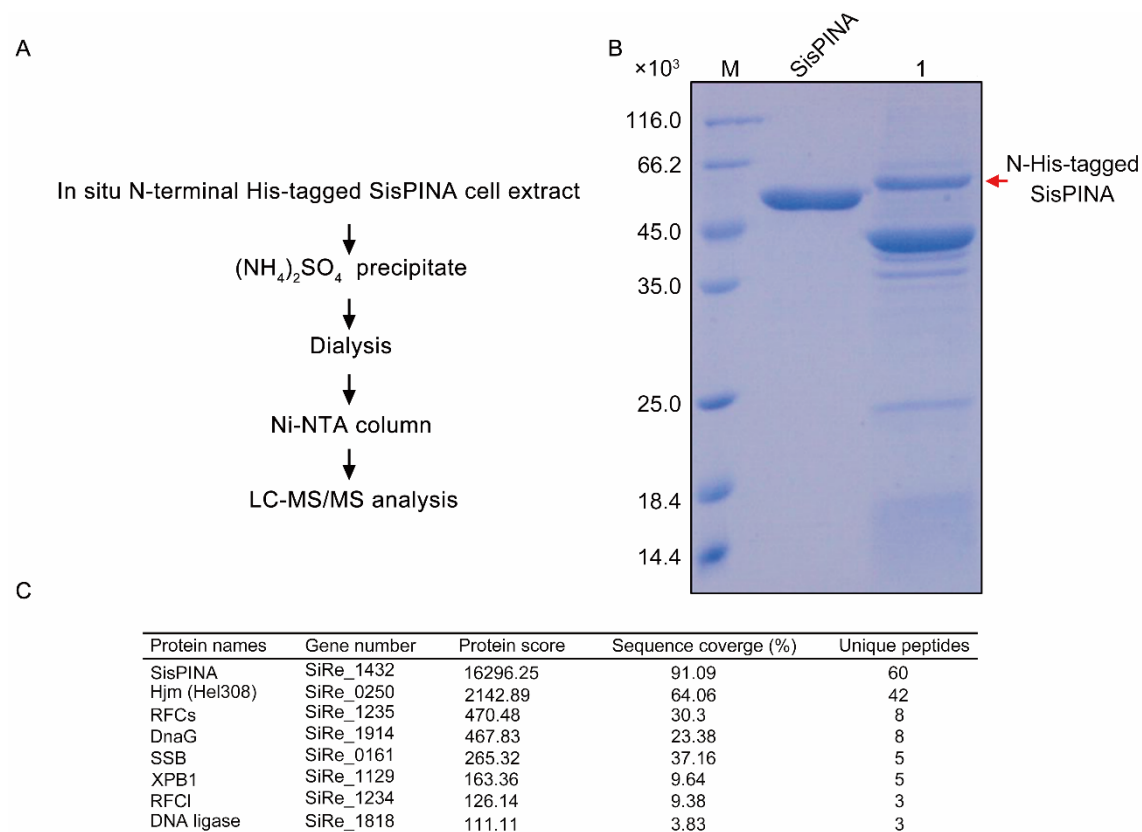

**Fig. S2 Identification of proteins that have potential interaction with SisPINA.** (A) Scheme for the purification of the N-terminal His-tagged SisPINA and its associated proteins from the modified strain of *S. islandicus* REY15A(E233S). (B) SDS-PAGE of the proteins. The His-tagged SisPINA was indicated with a red arrow. Purified SisPINA (no tag) from *E. coli* was used as a positive control. (C) The peptide coverage of SisPINA and DNA processing related proteins identified by LC-MS/MS. Proteins with scores of more than 100 are listed.

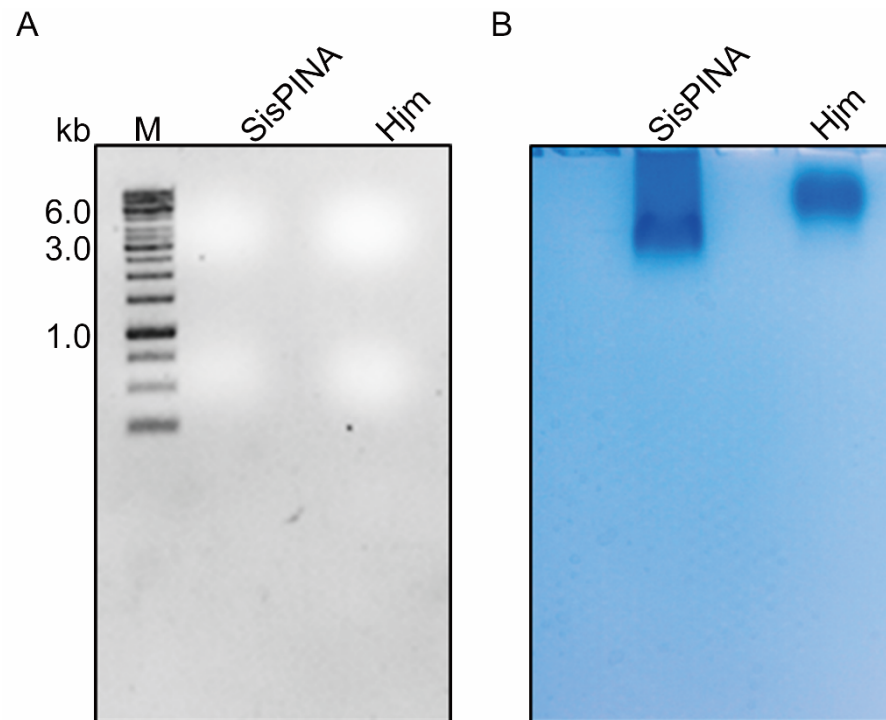

**Fig. S3 Purified SisPINA and Hjm samples do not contain DNA or RNA.** Purified SisPINA (10  $\mu$ g) and Hjm (10  $\mu$ g) were loaded into a 1% agarose gel. After electrophoresis, the gel was stained with ethidium bromide and observed under UV light (A). The proteins were checked by Coomassie brilliant blue staining (B). M, DNA size marker. The bright spots in (A) correspond to bromophenol blue and xylene cyanol present in the loading dye.

| Protein concentration<br>(nmol) | Elution volume (ml) |      |
|---------------------------------|---------------------|------|
|                                 | 10                  | 11   |
| SisPINA (Hexamer)               | 0.26                | 0.33 |
| Hjm (Monomer)                   | 0.34                | 0.41 |

  

| Protein concentration<br>(nmol)         | Elution volume (ml) |      |
|-----------------------------------------|---------------------|------|
|                                         | 13                  | 14   |
| SisPINA-R206A/R147K/<br>I199S (Monomer) | 0.63                | 1.49 |
| Hjm (Monomer)                           | 0.67                | 1.36 |

**Fig. S4 Estimation of the molar ratios of Hjm and PINA in the complexes of Hjm-SisPINA (A) and Hjm-SisPINA-R206A/R147K/I99S (B).** The percentages of Hjm and SisPINA or SisPINA-R206A/R147K/I99S in the elution fractions (10 and 11 in Fig. 1C, right panel; 13 and 14 in Fig. 4B lower panel) were estimated from the band intensity on the SDS-PAGE gels using Image J software. As the amount of loaded protein was known, the protein amount and concentrations in the fractions could be determined.

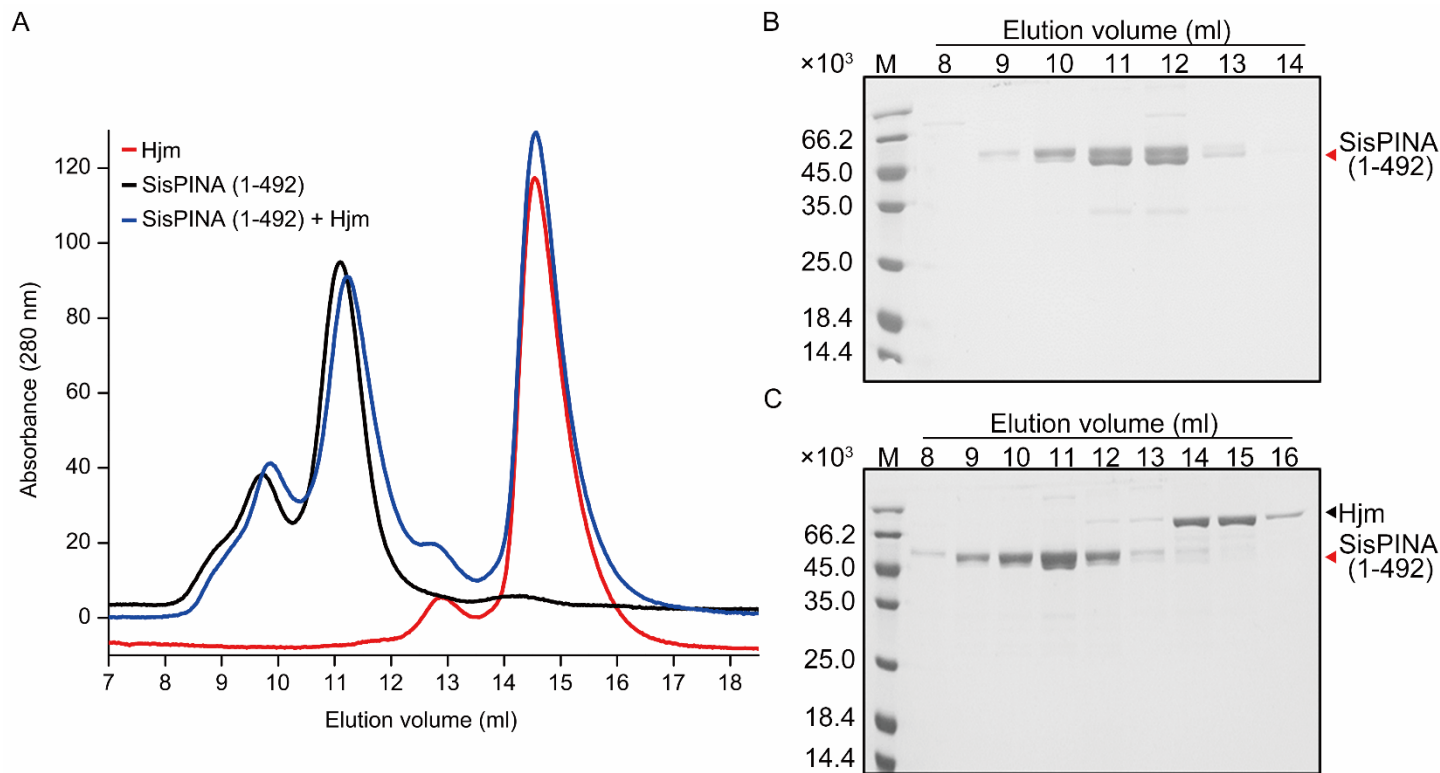

**Fig. S5 SisPINA(1-492) is unable to form a complex with SisHjm.** (A) Gel filtration profile of Hjm, SisPINA(1-492), and Hjm/SisPINA(1-492) mixture. The sample (500  $\mu$ l) of SisPINA(1-492) (350  $\mu$ g), Hjm (230  $\mu$ g), or their mixture was loaded onto the Superdex 200 column which was equilibrated with a buffer containing 25 mM Tris-HCl, pH 8.0, 200 mM NaCl, and 5% glycerol. (B) SDS-PAGE analysis of the fractions of SisPINA(1-492). (C) SDS-PAGE analysis of the fractions of Hjm/SisPINA(1-492) mixture. The elution fractions (1 ml each) were collected and analyzed.

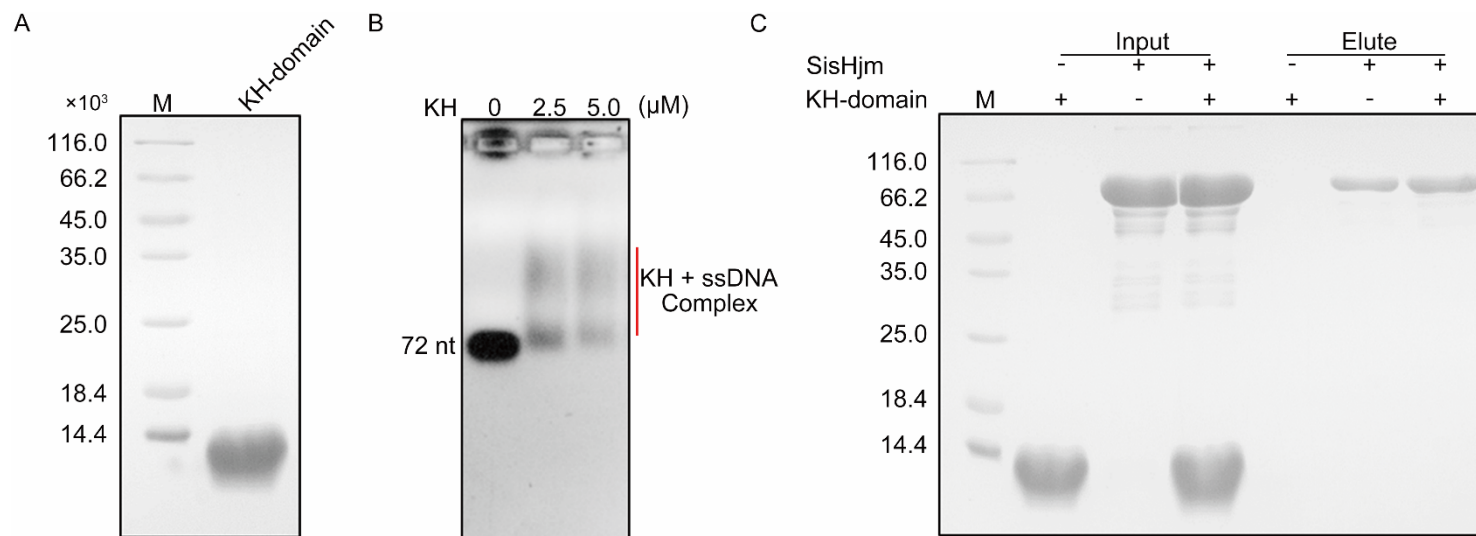

**Fig. S6 The KH domain of SisPINA alone is able to bind ssDNA but not Hjm *in vitro*.** (A) SDS-PAGE analysis of the KH domain of SisPINA. The recombinant protein was purified by HiTrap-Heparin and Superdex™ 200 10/300 GL columns. The gel was stained with Coomassie brilliant blue. (B) ssDNA binding of the KH domain. DNA binding assay was performed in a 20  $\mu$ l mixture containing 25 mM Tris-HCl, pH 8.0, 5 mM MgCl<sub>2</sub>, 0.1 mg/ml bovine serum albumin (BSA), 12% Glycerol, 1 mM DTT, 2.5  $\mu$ M ssDNA (72 nt), and the indicated amount of the protein. The samples were incubated at 30°C for 30 min and aliquots (20  $\mu$ l) were loaded onto a 1% agarose gel. The gel was stained with ethidium bromide and observed under UV light. (C) Analysis of the interaction between Hjm and the KH domain by pull-down. The non-tagged KH domain was incubated with the N-terminal His-tagged Hjm. The procedure was the same as for the analysis of the interaction between SisPINA and Hjm. The detailed procedure was described in the Materials and Methods.

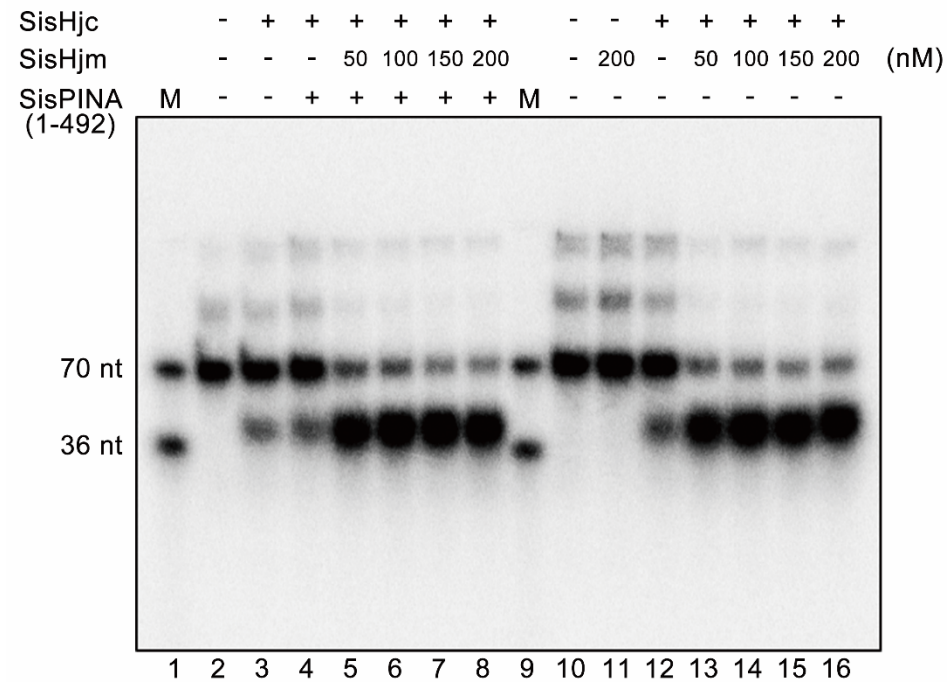

**Fig. S7 Holliday junction processing by SisPINA (1-492), SisHjm, and SisHjc complex.** The cleavage of HSL (mobile) HJ substrate by SisHjc in the presence of SisPINA (1-492) and SisHjm at indicated concentrations was analyzed by denatured gel electrophoresis. All of the reactions were carried out at 55°C for 30 min.



**Table S1 Primers used for gene cloning and genotype analysis.**

| Primer                        | Sequence (5' to 3')                         |
|-------------------------------|---------------------------------------------|
| SisPINA-MluI-Forward          | GTTC <u>ACGCGT</u> TATTGAATGATCTGATGTTAGATA |
| SisPINA-SalI-Reverse          | GCTGGT <u>CGACCT</u> AATCGGATAGTTTTATC      |
| SisPINA-NcoI-Forward          | GACG <u>CCATGG</u> ATGTAAACAAGTTAGGTATAC    |
| SisPINA-XhoI-Reverse          | GATTCT <u>CGAGCC</u> ATCACTTAAGGGTGGTCTAG   |
| SisPINA-Flanking-SalI-Forward | CGTAGT <u>CGACAT</u> GAAAGATAGGTATAATAGC    |
| SisPINA-Flanking-MluI-Reverse | ATCA <u>ACGCGT</u> AATCCTTATCCCCACTTTTCAATC |
| SisPINA-NdeI-Forward          | GCCG <u>CATATG</u> TTGAATGATCTGATGTTAGAT    |
| SisPINA(1-492)-SalI-Reverse   | GATC <u>GTTCGAC</u> CTACTCGAGTCTCTTTAGT     |
| SisPINA-KH-NdeI-Forward       | GTG <u>CCATATG</u> CCGGTGAATAGAGGAATAACAAT  |

The restriction enzyme sites are underlined. Other primers used in this study were as previously described in Zhai et al (1).

**Table S2 Oligonucleotides used for 3'- and 5'-overhang substrate preparation.**

| Name             | Sequence (5' to 3')                                                                      |
|------------------|------------------------------------------------------------------------------------------|
| Strand 1 (34 nt) | CAAGCTTGCATGCCTGCAGGTCGACTCTAGAGGA                                                       |
| Strand 2 (34 nt) | TCCTCTAGAGTCGACCTGCAGGCATGCAAGCTTG                                                       |
| Strand 3 (84 nt) | TCCTCTAGAGTCGACCTGCAGGCATGCAAGCTTGGCACTGGCCGTCCTTTTACAACGTCGTGACTGGGAAAACC<br>CTGGCGTTAC |
| Strand 4 (84 nt) | GTAACGCCAGGGTTTTCCAGTCACGACGTTGTAAAAGGACGGCCAGTGCCAAGCTTGCATGCCTGCAGGTCG<br>ACTCTAGAGGA  |

The 3'-overhang DNA (34/84 nts) contained strand 1 and strand 3. The 5'-overhang DNA (34/84 nts) contained strand 2 and strand 4. The oligonucleotides were used for other substrates were as previously described in Zhai et al (1).

**Table S3 Plasmids used and constructed in this study.**

| Plasmid                          | Description                                                                                                     | Sources    |
|----------------------------------|-----------------------------------------------------------------------------------------------------------------|------------|
| pSeSD-PINA-1                     | pSeSD carrying SisPINA (N-terminal 6 × His tag) and used as the MluI/SalI fragment for pMID-SisPINA-N-His       | This study |
| pMID-SisPINA-1                   | pMID carrying SisPINA with fused N-terminal 6 × His tag and arabinose promoter                                  | This study |
| pMID-SisPINA-N-His               | pMID-SisPINA-1 carrying the flanking sequence down-stream of SisPINA for replacing the chromosomal SisPINA gene | This study |
| pET15bm-SisPINA                  | pET15bm carrying SisPINA (no tag) as a NdeI/SalI fragment                                                       | (1)        |
| pET15b-SisHjm                    | pET15b carrying SisHjm (N-terminal His tag) inserted at NdeI/SalI                                               | (2)        |
| pET15bm-SisPINA(1-492)           | pET15bm carrying SisPINA(1-492) (no tag) as NdeI/SalI fragment                                                  | This study |
| pET22b- SisPINAR206A/R147K/I199S | pET22b carrying SisPINAR206A/R147K/I199S (no tag) as NdeI/SalI fragment                                         | This study |
| pET22b-KH domain                 | pET22b carrying SisPINA gene for the KH domain (no tag) as a NdeI/SalI fragment                                 | This study |
| pRSFDuet-1-SisHjc                | pRSFDuet-1 carrying SisHjc (no tag) as a NdeI/XhoI fragment                                                     | (1)        |

**Table S4 *Sulfolobus islandicus* strains used and constructed in this study.**

| Strain                           | Description                                                                                                                                                            | Sources    |
|----------------------------------|------------------------------------------------------------------------------------------------------------------------------------------------------------------------|------------|
| <i>S. islandicus</i> REY15A      | Wild type                                                                                                                                                              | (3)        |
| <i>S. islandicus</i> E233S       | REY15A without <i>pyrEF</i> and <i>lacS</i>                                                                                                                            | (4)        |
| Sis/pMID-SisPINA-in-situ-N-His-T | E233S double-crossover transformant generated with pMID-SisPINA-N-His via downstream insertion, containing N-terminal His-tagged SisPINA, <i>pyrEF</i> and <i>lacS</i> | This study |

## References

1. Zhai B., DuPrez K., Doukov T.I., Li H., Huang M., Shang G., Ni J., Gu L., Shen Y., Fan L. Structure and function of a novel ATPase that interacts with Holliday junction resolvase Hjc and promotes branch migration. *J. Mol. Biol.* 2017; 429: 1009-1029.
2. Song X., Ni J., Shen Y. Structure-based genetic analysis of Hel308a in the hyperthermophilic archaeon *Sulfolobus islandicus*. *J. Genet. Genomics.* 2016; 43: 405-413.
3. Guo L., Brugger K., Liu C., Shah S.A., Zheng H., Zhu Y., Wang S., Lillestol R.K., Chen L., Frank J., Prangishvili D., Paulin L., She Q., Huang L., GARrett R.A. Genome analyses of Icelandic strains of *Sulfolobus islandicus*, model organisms for genetic and virus-host interaction studies. *J. Bacteriol.* 2011; 193: 1672-1680.
4. Deng L., Zhu H., Chen Z., Liang Y., She Q. Unmarked gene deletion and host-vector system for the hyperthermophilic crenarchaeon *Sulfolobus islandicus*. *Extremophiles.* 2009; 13: 735-746.
